# Supplementary material
Source: publisher figshare collection journal article supplement (https://plos.figshare.com/articles/dataset/_/6771296)
Supplement: Supplementary file 1 [file 1 › pone.0200379.s001.pdf]

**S1 Table.** Search strategy**Medline**

| No. | Searches                                                                                                                                        | Results |
|-----|-------------------------------------------------------------------------------------------------------------------------------------------------|---------|
| 1   | Myocardial infarction.ti,ab                                                                                                                     | 159864  |
| 2   | *Infarction/                                                                                                                                    | 5482    |
| 3   | Myocardial infarction/                                                                                                                          | 156910  |
| 4   | 1 or 2 or 3                                                                                                                                     | 226130  |
| 5   | exp Acute Coronary Syndrome/ or exp Coronary Disease/ or exp Coronary Artery Disease/ or exp Myocardial Infarction/ or exp Myocardial Ischemia/ | 400660  |
| 6   | exp Angina Pectoris/ or exp Angina, Unstable/ or Angina, Stable/                                                                                | 42098   |
| 7   | Angina.ti,ab.                                                                                                                                   | 49440   |
| 8   | 5 or 6 or 7                                                                                                                                     | 411636  |
| 9   | 4 or 8                                                                                                                                          | 455731  |
| 10  | (Glycopeptides or copeptins or "C-terminal provasopressin" or Glycopeptide or copeptin).ab,ti.                                                  | 10921   |
| 11  | exp Glycopeptides/                                                                                                                              | 54859   |
| 12  | (Arg\$Vasopressin or "Argipressin" or "Arginine Vasopressin").ab,ti.                                                                            | 10421   |
| 13  | exp Arginine Vasopressin/                                                                                                                       | 15116   |
| 14  | 10 or 11 or 12 or 13                                                                                                                            | 77975   |
| 15  | 9 and 14                                                                                                                                        | 524     |

**Embase**

| No. | Searches                                                                                                                                                                            | Results |
|-----|-------------------------------------------------------------------------------------------------------------------------------------------------------------------------------------|---------|
| 1   | Myocardial infarction.ti,ab.                                                                                                                                                        | 234668  |
| 2   | Heart infarction/ or acute heart infarction/ or infarction/ or ST segment elevation myocardial infarction/                                                                          | 355993  |
| 3   | Myocardial disease/                                                                                                                                                                 | 5432    |
| 4   | 1 or 2 or 3                                                                                                                                                                         | 399488  |
| 5   | exp heart infarction/                                                                                                                                                               | 347640  |
| 6   | exp heart muscle ischemia/                                                                                                                                                          | 86972   |
| 7   | exp coronary artery disease/ or exp ischemic heart disease/                                                                                                                         | 731532  |
| 8   | 5 or 6 or 7                                                                                                                                                                         | 731532  |
| 9   | exp angina pectoris/                                                                                                                                                                | 93008   |
| 10  | Angina.ti,ab.                                                                                                                                                                       | 68626   |
| 11  | 9 or 10                                                                                                                                                                             | 109739  |
| 12  | 8 or 11                                                                                                                                                                             | 738240  |
| 13  | 4 or 12                                                                                                                                                                             | 782857  |
| 14  | (Glycopeptides or copeptins or 'C-terminal provasopressin' or Glycopeptide or copeptin or 'Arg-Vasopressin' or 'Arg Vasopressin' or 'Argipressin' or 'Arginine Vasopressin').ab,ti. | 24463   |
| 15  | exp copeptin/ or exp glycopeptide/ or exp argipressin/                                                                                                                              | 23844   |
| 16  | 14 or 15                                                                                                                                                                            | 33927   |
| 17  | 13 and 16                                                                                                                                                                           | 883     |

## Cochrane library

| No. | Searches                                                                                                                                                                                                                                     | Results |
|-----|----------------------------------------------------------------------------------------------------------------------------------------------------------------------------------------------------------------------------------------------|---------|
| 1   | “myocardial infarction”:ti,ab,kw (Word variations have been searched)                                                                                                                                                                        | 22532   |
| 2   | MeSH descriptor: [Infarction] explode all trees                                                                                                                                                                                              | 20      |
| 3   | MeSH descriptor: [Myocardial Infarction] explode all trees                                                                                                                                                                                   | 10266   |
| 4   | #1 or #2 or #3                                                                                                                                                                                                                               | 22605   |
| 5   | MeSH descriptor: [Myocardial Ischemia] explode all trees                                                                                                                                                                                     | 25410   |
| 6   | MeSH descriptor: [Coronary Artery disease] explode all trees                                                                                                                                                                                 | 4119    |
| 7   | MeSH descriptor: [Coronary disease] explode all trees                                                                                                                                                                                        | 11982   |
| 8   | #5 or #6 or #7                                                                                                                                                                                                                               | 25410   |
| 9   | MeSH descriptor: [Angina Pectoris] explode all trees                                                                                                                                                                                         | 4339    |
| 10  | angina:ti,ab,kw (Word variations have been searched)                                                                                                                                                                                         | 10347   |
| 11  | #9 or #10                                                                                                                                                                                                                                    | 10349   |
| 12  | #8 or #11                                                                                                                                                                                                                                    | 29994   |
| 13  | #4 or #12                                                                                                                                                                                                                                    | 38856   |
| 14  | "copeptin":ti,ab,kw (Word variations have been searched)                                                                                                                                                                                     | 102     |
| 15  | MeSH descriptor: [Glycopeptides] explode all trees or "glycopeptide":ti,ab,kw (Word variations have been searched)                                                                                                                           | 1778    |
| 16  | MeSH descriptor: [Vasopressins] explode all trees or MeSH descriptor: [Arginine Vasopressin] explode all trees or "vasopressin":ti,ab,kw (Word variations have been searched) or "argipressin":ti,ab,kw (Word variations have been searched) | 2174    |
| 17  | #14 or #15 or #16                                                                                                                                                                                                                            | 3979    |
| 19  | #13 and #18                                                                                                                                                                                                                                  | 89      |

A literature search was performed on April 13, 2018.
