# Supplementary material
Source: publisher figshare collection journal article supplement (https://plos.figshare.com/articles/dataset/_/6771296)
Supplement: Supplementary file 1 [file 1 › pone.0200379.s002.pdf]

**S2 Table.** Number of true positives, true negatives, false positives, and false negatives based on the cardiac troponin I or high-sensitivity troponin T cut-point for studies providing this data.

| Study       | cTn cut-point<br>(ng/L) | TP (n) | FP (n) | FN (n) | TN (n) | Sensitivity (%) | Specificity (%) | PPV (%) | NPV (%) |
|-------------|-------------------------|--------|--------|--------|--------|-----------------|-----------------|---------|---------|
| Alquezar    | hs-cTnT (14)            | 57     | 70     | 6      | 164    | 90.5            | 70.1            | 44.9    | 96.5    |
| Bahrman     | hs-cTnT (14)            | 37     | 163    | 1      | 105    | 97.4            | 39.2            | 18.5    | 99.1    |
| Charpentier | cTnI (100)              | 53     | 7      | 42     | 539    | 55.8            | 98.7            | 88.3    | 92.8    |
| Collinson   | hs-cTnT (14)            | 49     | 28     | 14     | 712    | 77.8            | 96.2            | 63.6    | 98.1    |
| Dupuy       | cTnI (40)               | 13     | 3      | 2      | 103    | 86.7            | 97.2            | 81.3    | 98.1    |
| Eggers      | hs-cTnT (14)            | 101    | 59     | 27     | 173    | 78.9            | 74.6            | 63.1    | 86.5    |
| Jacobs      | cTnI (45)               | 66     | 20     | 29     | 469    | 69.5            | 95.9            | 76.7    | 94.2    |
| Maisel      | cTnI (40)               | 97     | 184    | 19     | 1627   | 83.6            | 89.8            | 34.5    | 98.8    |
| Meune       | hs-cTnT (14)            | 13     | 11     | 0      | 34     | 100             | 75.6            | 54.2    | 100     |
| Ricci       | cTnI (45)               | 23     | 2      | 6      | 165    | 79.3            | 98.8            | 92.0    | 96.5    |
| Sebbane     | hs-cTnT (14)            | 19     | 21     | 6      | 121    | 76.0            | 85.2            | 47.5    | 95.3    |
| Thelin      | hs-cTnT (14)            | 61     | 124    | 9      | 284    | 87.1            | 69.6            | 33.0    | 96.9    |
| Vafaie      | hs-cTnT (14)            | 24     | 34     | 4      | 69     | 85.7            | 67.0            | 41.4    | 94.5    |
| Wildi       | cTnI (40)               | 268    | 132    | 90     | 1439   | 74.9            | 91.6            | 67.0    | 94.1    |

Abbreviations: cTn = cardiac troponin; TP = true positive; FP = false positive; FN = false negative; TN = true negative; NPV = negative predictive value; PPV = positive predictive value; hs-cTnT = high-sensitivity cardiac troponin T; cTnI = cardiac troponin I
