# Supplementary material
Source: publisher figshare collection journal article supplement (https://plos.figshare.com/articles/dataset/_/6771296)
Supplement: Supplementary file 1 [file 1 › pone.0200379.s003.pdf]

**S3 Table.** Number of true positives, true negatives, false positives, and false negatives based on the addition of copeptin to cardiac troponin I or high-sensitivity troponin T cut-point for studies providing this data.

| Study       | Copeptin cut-point (pmol/L) | TP (n) | FP (n) | FN (n) | TN (n) | Sensitivity (%) | Specificity (%) | PPV (%) | NPV (%) |
|-------------|-----------------------------|--------|--------|--------|--------|-----------------|-----------------|---------|---------|
| Alquezar    | 10                          | 61     | 150    | 2      | 84     | 96.8            | 35.9            | 28.9    | 97.7    |
| Bahrman     | 14                          | 38     | 206    | 0      | 62     | 100             | 23.1            | 15.6    | 100     |
| Charpentier | 14                          | 83     | 151    | 12     | 395    | 87.4            | 72.3            | 35.5    | 97.1    |
| Collinson   | 7.4                         | 53     | 299    | 10     | 441    | 84.1            | 59.6            | 15.1    | 97.8    |
| Dupuy       | 10.4                        | 14     | 44     | 1      | 62     | 93.3            | 58.5            | 24.1    | 98.4    |
| Eggers      | 14                          | 110    | 87     | 18     | 145    | 85.9            | 62.5            | 55.8    | 89.0    |
| Jacobs      | 14                          | 80     | 150    | 15     | 339    | 84.2            | 69.3            | 34.8    | 95.8    |
| Maisel      | 14                          | 107    | 677    | 9      | 1134   | 92.2            | 62.6            | 13.6    | 99.2    |
| Meune       | 14                          | 13     | 21     | 0      | 23     | 100             | 52.3            | 38.2    | 100     |
| Ricci       | 10                          | 29     | 43     | 0      | 124    | 100             | 74.3            | 40.3    | 100     |
| Sebbane     | 13.11                       | 24     | 52     | 1      | 90     | 96.0            | 63.4            | 31.6    | 98.9    |
| Thelin      | 14                          | 67     | 207    | 3      | 201    | 95.7            | 49.3            | 24.5    | 98.5    |
| Vafaie      | 10                          | 27     | 44     | 1      | 59     | 96.4            | 57.3            | 38.0    | 98.3    |
| Wildi       | 9                           | 322    | 584    | 36     | 987    | 89.9            | 62.8            | 35.5    | 96.5    |

Abbreviations: TP = true positive; FP = false positive; FN = false negative; TN = true negative; NPV = negative predictive value; PPV = positive predictive value.
