# Supplementary material
Source: publisher figshare collection journal article supplement (https://plos.figshare.com/articles/dataset/_/6771296)
Supplement: Supplementary file 1 [file 1 › pone.0200379.s004.pdf]

**S4 Table.** Patient characteristics of included studies

| Study       | Age (years) | Men (%) | Previous CAD (%) | Previous MI (%) | Previous PCI/CABG (%) | HTN (%) | DM (%) | HLD (%) | Stroke (%) | Smoking (%) | Family history (%) | Obesity (%) |
|-------------|-------------|---------|------------------|-----------------|-----------------------|---------|--------|---------|------------|-------------|--------------------|-------------|
| Alquezar    | 69 (60-76)  | 67.0    | 33.7             | NR              | NR                    | 67.0    | 28.6   | NR      | NR         | NR          | NR                 | NR          |
| Bahrman     | 81 ± 6      | 48.7    | 45.1             | 33.3            | 24.5/12.4             | 84.3    | 33.7   | 67.3    | 23.9       | 6.9         | 30.4               | NR          |
| Charpentier | 58 ± 16     | 66.1    | 30.7             | NR              | NR                    | 42.6    | 12.8   | 39.9    | NR         | 28.9        | NR                 | NR          |
| Collinson   | 54 (44-64)  | 59.6    | NR               | 5.8             | 3.8/0.9               | 35.4    | 8.1    | 23.6    | NR         | 28.5        | NR                 | NR          |
| Dupuy       | 63 ± 17     | 63      | NR               | NR              | NR                    | NR      | NR     | NR      | NR         | NR          | NR                 | NR          |
| Eggers      | 67 (58-76)  | 65.6    | NR               | 37.5            | 17.5                  | 42.8    | 18.3   | 38.3    | NR         | 18.1        | NR                 | NR          |
| Jacobs      | 62 (51-73)  | 60.4    | 36.1             | NR              | NR                    | 40.0    | 16.8   | 34.0    | 8.9        | 38.2        | 41.3               | NR          |
| Maisel      | 56 ± 13     | 56.8    | 38.5             | 27.9            | 29.7                  | 69.8    | 28.8   | 55.9    | 33.1       | 10.0        | 45.3               | NR          |
| Meune       | 58 ± 14     | 63.8    | NR               | 20.7            | 19.0                  | 41.4    | 22.4   | 37.9    | NR         | 32.8        | 34.5               | 32.8        |
| Ricci       | 61 ± 16     | 64.3    | 31.1             | 21.4            | 15.3                  | 60.9    | 19.4   | 30.1    | NR         | 24.5        | 24.5               | 25.0        |
| Sebbane     | 61 (48-75)  | 63.4    | 21.6             | 14.8            | NR                    | 34      | 14.1   | 35.1    | 10         | 36.6        | NR                 | NR          |
| Thelin      | 66 (55-76)  | 62.6    | 38.5             | NR              | 21.1/12.3             | 53.6    | 20.7   | 38.7    | 10.9       | 14.4        | NR                 | NR          |
| Vafaie      | 64 ± 12     | 69.5    | NR               | 20.6            | 38.2/11.5             | 73.3    | 23.1   | 60.0    | 10.7       | 20.0        | 44.9               | 35.1        |
| Wildi       | 62 (50-75)  | 68.2    | 36.0             | 24.0            | 27.9                  | 63.6    | 17.9   | 50.3    | 5.3        | 25.1        | 21.6               | NR          |

\*Continuous variables are presented as mean ± SD or median (interquartile range).

Abbreviations: CAD = coronary artery disease; MI = myocardial infarction; PCI = percutaneous coronary intervention; CABG = coronary artery bypass grafting; HTN = hypertension; DM = diabetes mellitus; HLD = hyperlipidemia; NR = not reported.
