# Supplementary material
Source: publisher figshare collection journal article supplement (https://plos.figshare.com/articles/dataset/_/6771296)
Supplement: Supplementary file 1 [file 1 › pone.0200379.s005.pdf]

**S5 Table.** Sensitivity analysis for diagnostic accuracy of cardiac troponin alone and adding copeptin to cardiac troponin for non-ST-elevation myocardial infarction; except for one study that enrolled patients aged  $\geq 70$  years.

A. Cardiac troponin including cardiac troponin I and high-sensitivity cardiac troponin T

| Diagnostic tests<br>(95% CI) | cTn               | cTn with copeptin | difference           | <i>p-value</i> |
|------------------------------|-------------------|-------------------|----------------------|----------------|
| Sensitivity                  | 0.79 (0.73, 0.85) | 0.91 (0.88, 0.94) | 0.12 (0.10, 0.15)    | < .001         |
| Specificity                  | 0.90 (0.83, 0.97) | 0.60 (0.54, 0.66) | -0.30 (-0.33, -0.26) | < .001         |
| PPV                          | 0.61 (0.50, 0.73) | 0.30 (0.19, 0.42) | -0.31 (-0.37, -0.24) | < .001         |
| NPV                          | 0.96 (0.95, 0.98) | 0.98 (0.96, 0.99) | 0.01 (0.01, 0.02)    | 0.001          |
| AUC                          | 0.91 (0.90, 0.90) | 0.83 (0.81, 0.84) | NA                   | < .001         |

B. Diagnostic accuracy of adding copeptin to high-sensitivity cardiac troponin T

| Type of cTn                  | cTnI              |                    |                      |                | Hs-cTnT           |                       |                      |                |
|------------------------------|-------------------|--------------------|----------------------|----------------|-------------------|-----------------------|----------------------|----------------|
| Diagnostic tests<br>(95% CI) | cTnI              | cTnI with copeptin | Difference           | <i>p-value</i> | hs-cTnT           | hs-cTnT with copeptin | Difference           | <i>p-value</i> |
| Sensitivity                  | 0.71 (0.60, 0.82) | 0.89 (0.86, 0.93)  | 0.18 (0.13, 0.23)    | < .001         | 0.83 (0.77, 0.90) | 0.92 (0.87, 0.96)     | 0.09 (0.06, 0.12)    | < .001         |
| Specificity                  | 0.96 (0.92, 1.00) | 0.67 (0.62, 0.72)  | -0.29 (-0.32, -0.26) | < .001         | 0.80 (0.67, 0.93) | 0.54 (0.46, 0.61)     | -0.26 (-0.31, -0.21) | < .001         |
| PPV                          | 0.73 (0.52, 0.95) | 0.29 (0.14, 0.44)  | -0.44 (-0.56, -0.32) | < .001         | 0.49 (0.40, 0.58) | 0.44 (0.22, 0.65)     | -0.05 (-0.13, 0.03)  | 0.101          |
| NPV                          | 0.96 (0.93, 0.99) | 0.98 (0.96, 1.00)  | 0.02 (0, 0.04)       | 0.024          | 0.96 (0.94, 0.98) | 0.93 (0.89, 0.98)     | -0.03 (-0.05, -0.01) | 0.001          |
| AUC                          | 0.93 (0.92, 0.95) | 0.80 (0.78, 0.82)  | NA                   | < .001         | 0.90 (0.88, 0.92) | 0.81 (0.78, 0.83)     | NA                   | < .001         |

Abbreviations: cTn = cardiac troponin; cTnI = cardiac troponin I; hs-cTnT = high sensitivity cardiac troponin T; 95% CI = 95% confident interval; PPV = positive predictive value; NPV = negative predictive value; AUC = area under the summary receiver operating characteristic curve; NA = not available.
