# Supplementary material
Source: publisher figshare collection journal article supplement (https://plos.figshare.com/articles/dataset/_/6771296)
Supplement: Supplementary file 1 [file 1 › pone.0200379.s006.pdf]

**S1 Figure.** Assessment risk of bias using Quality Assessment of Diagnostic Accuracy Studies - 2 tool

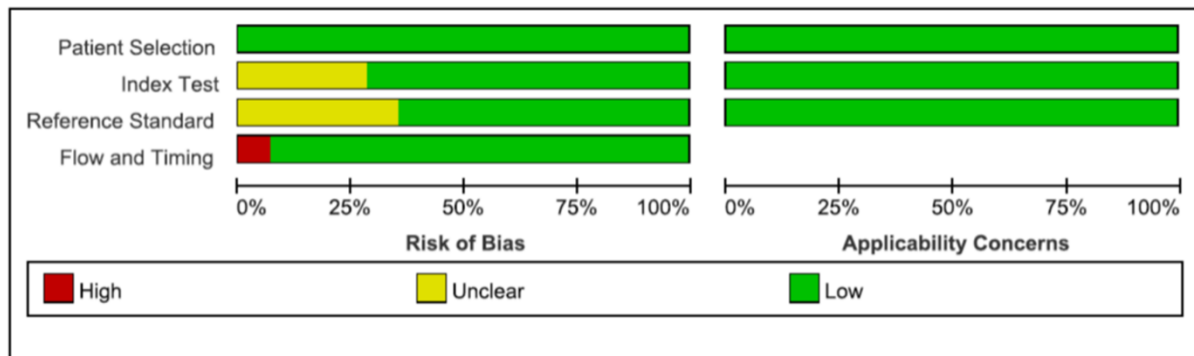

|                  | Risk of Bias      |            |                    |                 | Applicability Concerns |            |                    |
|------------------|-------------------|------------|--------------------|-----------------|------------------------|------------|--------------------|
|                  | Patient Selection | Index Test | Reference Standard | Flow and Timing | Patient Selection      | Index Test | Reference Standard |
| Alquezar 2017    | +                 | +          | +                  | +               | +                      | +          | +                  |
| Bahrman 2013     | +                 | +          | +                  | +               | +                      | +          | +                  |
| Charpentier 2012 | +                 | +          | +                  | +               | +                      | +          | +                  |
| Collinson 2013   | +                 | ?          | ?                  | +               | +                      | +          | +                  |
| Dupuy 2012       | +                 | ?          | ?                  | +               | +                      | +          | +                  |
| Eggers 2012      | +                 | +          | +                  | +               | +                      | +          | +                  |
| Jacobs 2015      | +                 | +          | +                  | +               | +                      | +          | +                  |
| Maisel 2013      | +                 | ?          | ?                  | +               | +                      | +          | +                  |
| Meune 2011       | +                 | ?          | ?                  | +               | +                      | +          | +                  |
| Ricci 2016       | +                 | +          | +                  | +               | +                      | +          | +                  |
| Sebbane 2013     | +                 | +          | +                  | +               | +                      | +          | +                  |
| Thelin 2013      | +                 | +          | +                  | +               | +                      | +          | +                  |
| Vafaie 2015      | +                 | +          | +                  | +               | +                      | +          | +                  |
| Wildi 2015       | +                 | +          | ?                  | ●               | +                      | +          | +                  |

Legend: ● High, ? Unclear, + Low
